# Supplementary material for: The Gut Microbiota in Women Suffering from Gestational Diabetes Mellitus with the Failure of Glycemic Control by Lifestyle Modification
Source: Hindawi journal article supplement (doi:10.1155/2019/6081248), 2019-10-23
Supplement: f1 [file 6081248.f1.pdf]

---

## **Supplementary material**

The gut microbiota in women suffering from gestational diabetes mellitus with the failure of glycemic control by lifestyle modification

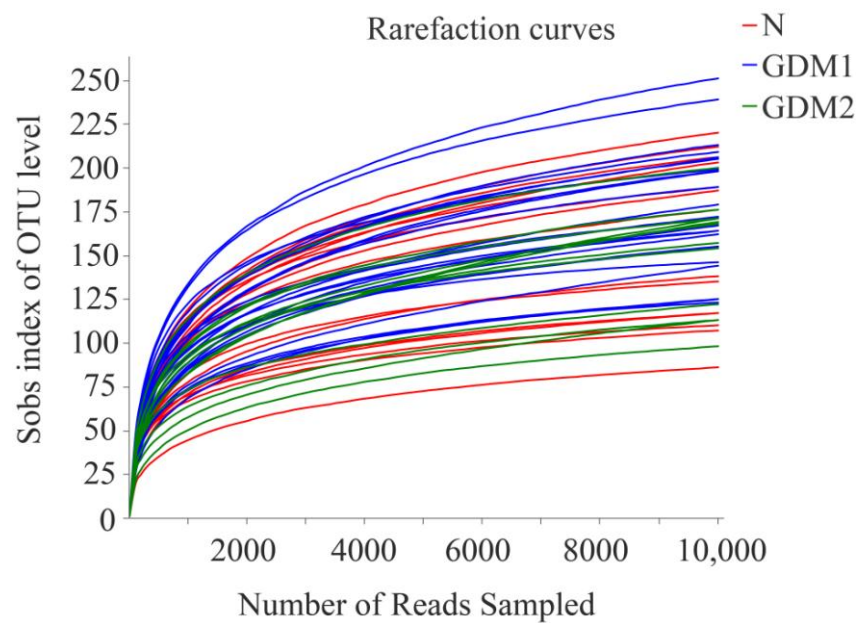

Fig S1: Rarefaction curve was used to evaluate the richness of fecal bacteria in all groups (at the level of 97% similarity)

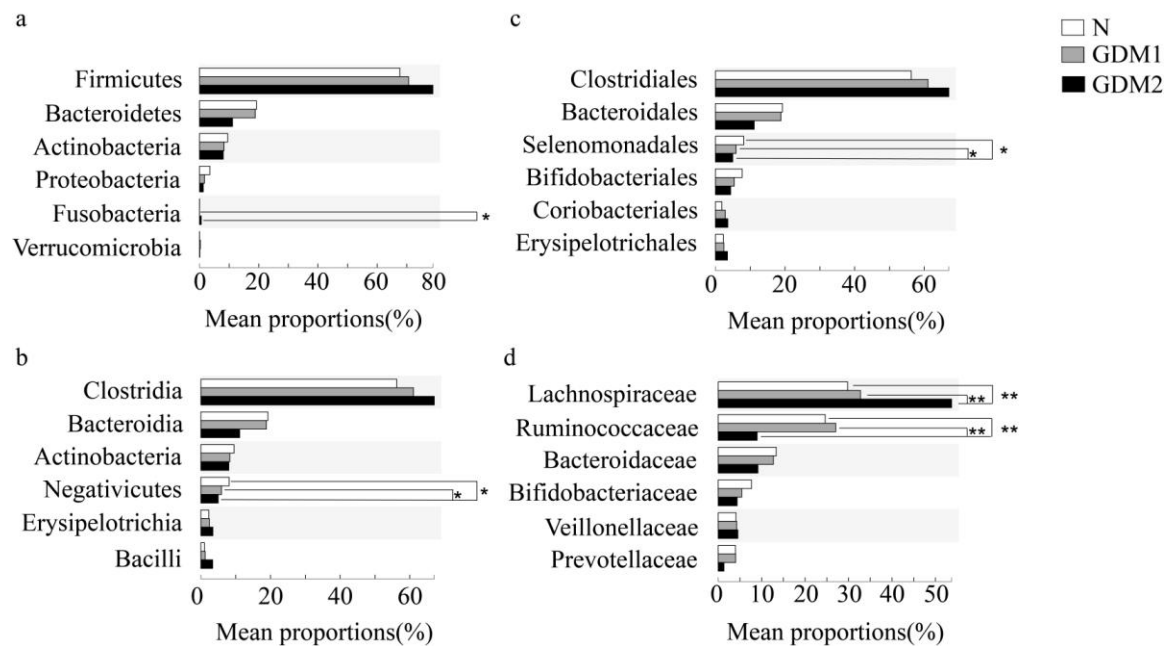

Fig S2: Gut microbiota differences among the N, GDM1, and GDM2 groups

**a** represents the phylum level, **b** represents the class level, **c** represents the order level, and **d** represents the family level. Pairwise comparison in multiple groups was conducted with Benjamin Hochberg, \* $P < 0.05$ , and \*\* $P < 0.01$ .

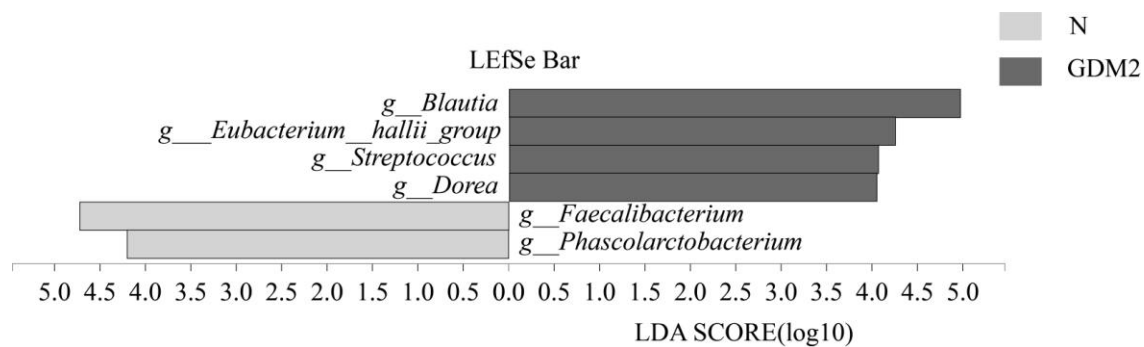

Fig S3: Taxonomic biomarkers between N and GDM2

LefSe analysis shows differentially abundant genera as biomarkers determined using Kruskal-Wallis test ( $P < 0.05$ ) with LDA score  $> 4.0$ . The LDA discriminant histogram statistics showed that there were significant microbial groups in the two groups. The LDA score obtained by LDA analysis (linear regression analysis), the larger the LDA score, the greater the influence of species abundance on the difference effect.

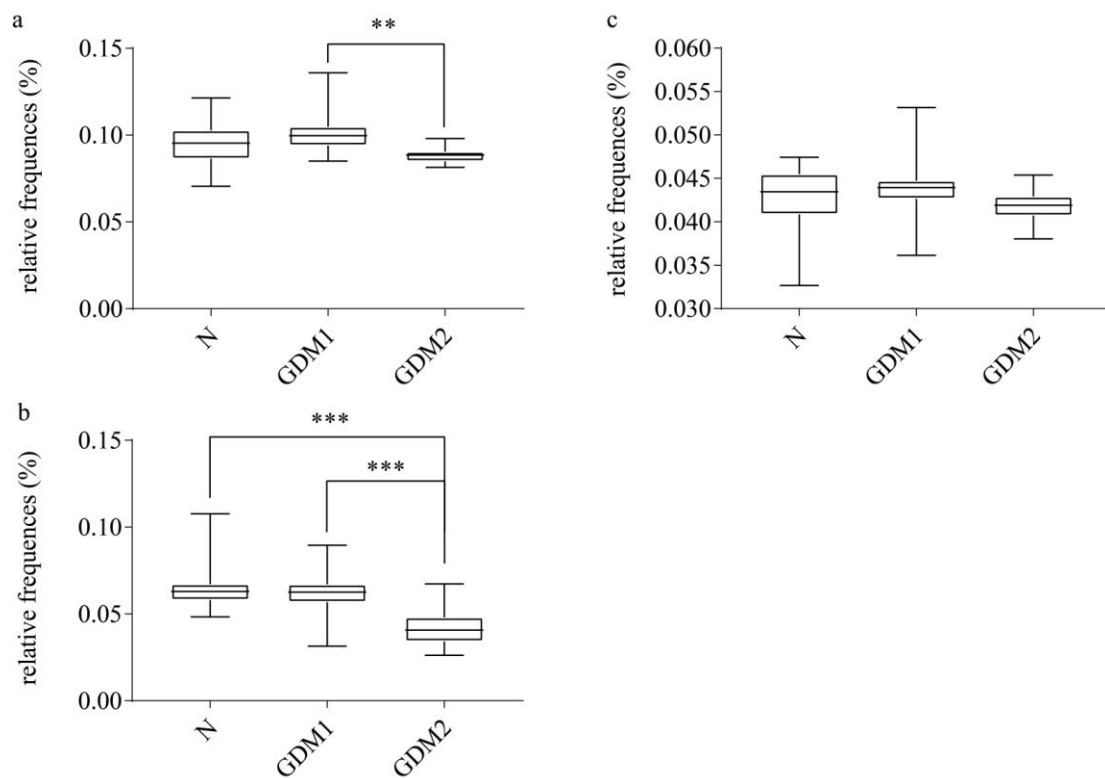

Fig S4: The predicted functional module involving PPAR signaling pathways among N, GDM1 and GDM2

a. Insulin signaling pathway; b. Adipocytokine signaling pathway; c. Progesterone mediated oocyte maturation.

Table S1. Suggestions of the dietary examples (1800 kcal)

| Meals                  | The food and the amount                                                                                                                                                                                                 | Notes                                       |
|------------------------|-------------------------------------------------------------------------------------------------------------------------------------------------------------------------------------------------------------------------|---------------------------------------------|
| Breakfast<br>7:00-8:00 | 1 staple food (e.g. 1 whole-wheat bread, 35g)<br><br>cold melon and fruit 150g (e.g. cucumber and tomato or 150g lettuce)<br><br>1 boiled egg (60g)<br><br>1 low fat milk (200ml)                                       | about 300 kcal                              |
| Snacks<br>9:00-10:00   | Choose two from the following three choices:<br><br>1 fruit (about 200g)<br><br>1 nut (e.g. 35g walnut or 15g cashew)<br><br>Yi Lijia (3 spoons)                                                                        | about 180-200 kcal                          |
| Lunch<br>12:00         | a small bowl of coarse cereals (75g)<br><br>1 meat food (e.g. 50g pig platoon or beef, or 100g fish and shrimp)<br><br>50-100g old tofu or dried tofu<br><br>At least 3 kinds of seasonal vegetables for about 200-250g | about 550 kcal (3g salt; 10g vegetable oil) |
| Snacks<br>14:00-15:00  | 1 cereals and potato food (e.g. 1 corn cob or 100g taro or 3 spoons Yi Lijia)<br><br>Half fruit (about 100g)                                                                                                            | about 135 kcal                              |
| Dinner<br>17:00-18:00  | a small bowl of coarse cereals (75g)<br><br>2 copies fish and meat (e.g. 200g fish or 150g chicken)<br><br>At least 3 kinds of seasonal vegetables for about 200-250g                                                   | about 550 kcal (3g salt; 10g vegetable oil) |
| Snacks<br>20:00-21:00  | Choose one from the following two choices:<br><br>130g sugar-free yogurt or 1 dessert for about 90g Yi Lijia (3 spoons)                                                                                                 | about 90-110 kcal                           |

According to blood glucose and weight, exercise should be performed for 30 to 40 minutes after meal

Table S2. Suggestions of dietary examples (2000 kcal)

| Meals                  | The food and the amount                                                                                                                                                                                                 | Notes                                       |
|------------------------|-------------------------------------------------------------------------------------------------------------------------------------------------------------------------------------------------------------------------|---------------------------------------------|
| Breakfast<br>7:00-8:00 | 1 staple food (e.g. 1 whole-wheat bread, 35g)<br><br>cold melon and fruit 150g (e.g. cucumber and tomato or 150g lettuce)<br><br>1 boiled egg (60g)<br><br>1 low fat milk (200ml)                                       | about 300 kcal                              |
| Snacks<br>9:00-10:00   | Choose two from the following three choices:<br><br>1 fruit (e.g. 200g apples or pears, and 150g bananas)<br><br>1 nut (e.g. 35g walnut or 15g cashew)<br><br>Yi Lijia (3 spoons)                                       | about 180-200 kcal                          |
| Lunch<br>12:00         | a small bowl of coarse cereals (75g)<br><br>1 meat food (e.g. 50g pig platoon or beef, or 100g fish and shrimp)<br><br>50-100g old tofu or dried tofu<br><br>At least 3 kinds of seasonal vegetables for about 200-250g | about 550 kcal (3g salt; 10g vegetable oil) |
| Snacks<br>14:00-15:00  | 1 cereals and potato food (e.g. 1 corn cob or 100g taro or 3 spoons Yi Lijia)<br><br>Half fruit (about 100g)                                                                                                            | About 200 kcal                              |
| Dinner<br>17:00-18:00  | a small bowl of coarse cereals (75g)<br><br>2 copies fish and meat (e.g. 200g fish or 150g chicken)<br><br>At least 3 kinds of seasonal vegetables for about 200-250g                                                   | about 550 kcal (3g salt; 10g vegetable oil) |
| Snacks<br>20:00-21:00  | Choose one from the following two choices:<br><br>200g low fat milk<br><br>25g sugar-free oatmeal                                                                                                                       | about 180 kcal                              |

---

Yi Lijia (3 spoons)

---

According to blood glucose and weight, and take exercise for 30 to 40 minutes after meal



Table S3. Bacterial alpha diversity estimators

|              | N ( $\bar{X} \pm \text{SD}$ ) | GDM1 ( $\bar{X} \pm \text{SD}$ ) | GDM2 ( $\bar{X} \pm \text{SD}$ ) | <i>P</i> |
|--------------|-------------------------------|----------------------------------|----------------------------------|----------|
| Sobs         | 161.88 $\pm$ 44.66            | 177.42 $\pm$ 34.19               | 151 $\pm$ 31.654                 | 0.36     |
| chao         | 192.49 $\pm$ 56.74            | 218.04 $\pm$ 42.96               | 194.78 $\pm$ 43.61               | 0.26     |
| shannon      | 3.47 $\pm$ 0.43               | 3.53 $\pm$ 0.41                  | 3.41 $\pm$ 0.41                  | 0.66     |
| simpson      | 0.07 $\pm$ 0.04               | 0.07 $\pm$ 0.06                  | 0.07 $\pm$ 0.04                  | 0.80     |
| shannoneven  | 0.69 $\pm$ 0.06               | 0.68 $\pm$ 0.07                  | 0.68 $\pm$ 0.06                  | 0.96     |
| simpsonesven | 0.11 $\pm$ 0.04               | 0.10 $\pm$ 0.04                  | 0.11 $\pm$ 0.04                  | 0.58     |

Note: The Kruskal-Wallis H test was used for comparing three groups.

Table S4. The relative abundance of gut microbiota (genus level) among N, GDM1 and GDM2

|                                            | N             | GDM1          | GDM2          | Chi-Square | <i>P</i> |
|--------------------------------------------|---------------|---------------|---------------|------------|----------|
| <i>Blautia</i>                             | 0.049 (0.045) | 0.068(0.031)  | 0.255 (0.213) | 16.368     | 2.791E-4 |
| <i>Faecalibacterium</i>                    | 0.136(0.106)  | 0.129(0.139)  | 0.044(0.055)  | 11.640     | 2.968E-3 |
| <i>Eubacterium_hallii_</i><br><i>group</i> | 0.009(0.009)  | 0.012 (0.012) | 0.049(0.041)  | 20.123     | 4.270E-5 |
| <i>Subdoligranulum</i>                     | 0.033(0.040)  | 0.043 (0.057) | 0.015 (0.019) | 8.270      | 0.016    |
| <i>Phascolarctobacteriu</i><br><i>m</i>    | 0.010(0.045)  | 0.011(0.021)  | 0.002(0.002)  | 7.276      | 0.026    |
| <i>Roseburia</i>                           | 0.024 (0.019) | 0.014(0.023)  | 0.006 (0.009) | 6.844      | 0.033    |

Note: The Kruskal-Wallis H test was used for comparing three groups. Data were presented as median (interquartile range).

Table S5. Potential trends in the relative abundance of gut microbiota among the groups with Spearman's rank correlation test

|                                 | Trends in the relative abundance among the groups <sup>a</sup> |          |
|---------------------------------|----------------------------------------------------------------|----------|
|                                 | <i>r</i>                                                       | <i>P</i> |
| <i>Blautia</i>                  | 0.533                                                          | 0.000048 |
| <i>Eubacterium_hallii_group</i> | 0.599                                                          | 0.000003 |
| <i>Faecalibacterium</i>         | -0.419                                                         | 0.002    |

Note: a: N (Assignment: 0), GDM1 (Assignment: 1), and GDM2 (Assignment: 2)
